# Supplementary material for: Reproducibility and Feasibility of Classification and National Guidelines for Histological Diagnosis of Canine Mammary Gland Tumours: A Multi-Institutional Ring Study
Source: MDPI journal article supplement (doi:10.3390/vetsci9070357), 2022-07-13
Supplement: s1 [file s1]

**Table S1. Histological grading given by panellists (P) for the 36 canine mammary tumor samples included in the study, majority opinion (GM) for grade is given for those with a majority opinion of malignancy. No GM grade was given to three malignant cases with a subtype GM (see table 5) for which grading is not expected (i.e. squamous cell carcinoma, sarcoma, and carcinosarcoma).**

| Sample ID | P01 | P02 | P03 | P04 | P05 | P06 | P07 | P08 | P09 | P10 | P11 | P12 | P13 | P14 | P15 | GM grade   | GM H/B/M |
|-----------|-----|-----|-----|-----|-----|-----|-----|-----|-----|-----|-----|-----|-----|-----|-----|------------|----------|
| 1         |     |     | II  | II  | III | I   | I   | I   | II  | II  | III |     | II  | I   | II  | II         | M        |
| 2         | III | II  | I   | II  | I   | III | II  | II  | III | III | II  | I   | III | I   | III | III        | M        |
| 3         |     |     | I   | I   | I   |     |     |     |     |     |     |     | I   |     |     |            | B        |
| 4         | I   | II  | I   | I   |     | I   | I   | II  | II  | II  | I   | I   | II  | I   | II  | I          | M        |
| 5         | II  | I   | II  | II  | I   | II  | III | I   | II  | II         | M        |
| 6         |     | III | II  | II  | I   | II  | II  | II  | III | III | I   | II  | II  | I   | III | II         | M        |
| 7         | I   |     | II  |     | I   | I   | I   | I   |     |     |     | I   |     |     |     |            | B        |
| 8         |     |     |     |     |     |     |     |     |     |     |     |     |     |     |     |            | H        |
| 9         |     |     |     |     |     |     |     |     |     |     |     |     |     |     |     |            | H        |
| 10        | II  |     |     |     |     | I   | I   |     | II  |     |     |     |     | I   | II  |            |          |
| 11        | III | III | III | II  | I   | III | III | II  | III | III | III | II  | III | II  | III | III        | M        |
| 12        |     |     |     |     | II  |     |     |     |     |     |     |     |     |     |     |            | H        |
| 13        |     |     | I   |     |     |     |     | I   |     |     |     |     |     |     |     |            | H        |
| 14        | II  | II  | III | III |     |     | III | II  |     | II  | II  | II  | II  | I   |     | II         | M        |
| 15        |     |     |     |     |     |     |     | I   |     |     |     |     |     |     |     |            | B        |
| 16        |     | III |     |     |     |     |     | II  |     |     |     |     |     |     |     | no grading | M        |
| 17        |     | I   | III | I   |     | I   | II  | II  |     | II  | II  | I   | I   | I   |     | I          | M        |
| 18        |     |     |     |     |     |     |     |     |     |     |     |     |     |     |     |            | H        |
| 19        |     |     |     |     |     |     |     |     |     |     |     |     |     |     |     |            | B        |
| 20        | III |     |     | III |     |     |     |     |     |     |     |     |     | III |     | no grading | M        |
| 21        | III | II  | III | II  |     | III | III | III |     | III | II  | II  | III |     |     | III        | M        |
| 22        |     |     |     |     |     |     |     |     |     |     |     |     |     |     |     |            | H        |
| 23        |     |     |     |     |     |     |     |     |     |     |     |     |     |     |     |            | H        |
| 24        | II  | II  | I   | I   |     | II  | I   | II  | III | II  | II  | I   | II  | I   | III | II         | M        |
| 25        |     |     |     |     | I   |     |     |     |     |     |     |     |     |     |     | no grading | M        |
| 26        |     |     |     |     |     |     |     |     |     |     |     |     | II  |     |     |            | B        |
| 27        | II  |     | II  | II  |     |     | II  | III |     | III | II  | II  |     | II  |     | II         | M        |
| 28        | II  | II  | I   | II  |     | II  | I   | II  |     | II  | II  | II  | III | I   |     | II         | M        |
| 29        |     |     |     |     |     |     |     |     |     | I   |     |     |     |     |     |            | B        |
| 30        | I   | II  | III | I   |     | III | I   | II  | III | II  | I   | II  | II  | I   | III | -          | M        |

|    |     |    |     |    |   |    |    |     |    |    |    |     |    |    |    |            |   |
|----|-----|----|-----|----|---|----|----|-----|----|----|----|-----|----|----|----|------------|---|
| 31 | II  | I  | II  | II | I | II | II | III | I  | II | I  | I   | II | I  | II | II         | M |
| 32 |     |    | I   |    | I |    |    |     |    |    |    |     |    |    |    |            | B |
| 33 |     | I  | II  | II |   |    |    | I   | II | II | I  | I   | II |    | II |            | M |
| 34 | III |    | II  | II | I | II |    |     |    |    |    |     |    | I  |    | no grading | M |
| 35 |     |    |     |    |   |    |    |     |    |    |    |     |    |    |    |            | H |
| 36 | III | II | III |    |   |    | II | III |    |    | II | III |    | II |    | -          | M |

H, hyperplasia-dysplasia; B, benign tumour; M, malignant tumour; GM, majority opinion
